# Supplementary material
Source: PubMed Central journal article supplement (PMC3730040)
Supplement: neo1508_0875SD1.pdf [file neo1508_0875SD1.pdf]

**Table W1.** List of Antibodies.

| Antibody          | Supplier                        | Antibody                           | Supplier                         |
|-------------------|---------------------------------|------------------------------------|----------------------------------|
| $\alpha_6\beta_4$ | Clone B5.5 [1]                  | Hyaluronan                         | Rockland, Gilbertsville, PA      |
| Akt               | BD, Heidelberg, Germany         | HGF                                | Santa Cruz, Heidelberg, Germany  |
| ADAM10            | Santa Cruz, Heidelberg, Germany | HGDF                               | Santa Cruz, Heidelberg, Germany  |
| ADAM17            | Santa Cruz, Heidelberg, Germany | HAdase                             | Santa Cruz, Heidelberg, Germany  |
| ADAMTS1           | Santa Cruz, Heidelberg, Germany | LN $\gamma$ 1                      | Rockland, Gilbertsville, PA      |
| ADAMTS5           | Santa Cruz, Heidelberg, Germany | LN $\gamma$ 2                      | BD, Heidelberg, Germany          |
| ADAMTS8           | Santa Cruz, Heidelberg, Germany | MMP2                               | Dianova, Hamburg, Germany        |
| BAD               | Santa Cruz, Heidelberg, Germany | MMP3                               | Santa Cruz, Heidelberg, Germany  |
| Bcl2              | BD, Heidelberg, Germany         | MMP9                               | Dianova, Hamburg, Germany        |
| BclXI             | BD, Heidelberg, Germany         | MMP13                              | Dianova, Hamburg, Germany        |
| bFGF              | Oncogene, Boston, MA            | MMP14                              | Santa Cruz, Heidelberg, Germany  |
| act.Caspase3      | BD, Heidelberg, Germany         | Osteopontin                        | Santa Cruz, Heidelberg, Germany  |
| Caspase8          | BD, Heidelberg, Germany         | p38                                | BD, Heidelberg, Germany          |
| cl.Caspase9       | BD, Heidelberg, Germany         | p-Akt                              | BD, Heidelberg, Germany          |
| CD11b             | Clone Ox42 (EAACC)              | p-BAD                              | Santa Cruz, Heidelberg, Germany  |
| CD11c             | Clone Ox41 (EAACC)              | p-c-jun                            | BD, Heidelberg, Germany          |
| CD13              | [2]                             | PDGF                               | BD, Heidelberg, Germany          |
| CD18              | BD, Heidelberg, Germany         | PDGFR                              | BD, Heidelberg, Germany          |
| CD29              | BD, Heidelberg, Germany         | p-ERK1,2                           | BD, Heidelberg, Germany          |
| CD31              | BD, Heidelberg, Germany         | PI3K                               | Santa Cruz, Heidelberg, Germany  |
| CD44s             | Clone Ox50 (EAACC)              | p-JNK                              | BD, Heidelberg, Germany          |
| CD44v6            | Clone A2.6 [1]                  | p-p38                              | BD, Heidelberg, Germany          |
| CD49b             | BD, Heidelberg, Germany         | p-ras                              | BD, Heidelberg, Germany          |
| CD49c             | BD, Heidelberg, Germany         | ras                                | BD, Heidelberg, Germany          |
| CD54              | Biozol, Eching, Germany         | SDF1                               | Abcam, Cambridge, United Kingdom |
| CD104             | BD, Heidelberg, Germany         | Tenascin                           | LabVision, Fremont, CA           |
| Coll I            | Rockland, Gilbertsville, PA     | TF                                 | Santa Cruz, Heidelberg, Germany  |
| Coll II           | LabVision, Fremont, CA          | Transforming growth factor $\beta$ | Santa Cruz, Heidelberg, Germany  |
| Coll IV           | Rockland, Gilbertsville, PA     | uPA                                | Calbiochem, Darmstadt, Germany   |
| CXCR4             | Santa Cruz, Heidelberg, Germany | uPAR                               | Calbiochem, Darmstadt, Germany   |
| EGFR              | Santa Cruz, Heidelberg, Germany | VEGF                               | Biotrend, Köln, Germany          |
| ERK1/2            | BD, Heidelberg, Germany         | VEGFR1                             | Biotrend, Köln, Germany          |
| FGFR              | Santa Cruz, Heidelberg, Germany | Vimentin                           | BD, Heidelberg, Germany          |
| FN                | BD, Heidelberg, Germany         | Vitronectin                        | Biotrend, Köln, Germany          |
|                   |                                 | vWF                                | Abcam, Cambridge, United Kingdom |
|                   |                                 |                                    | Dianova, Hamburg, Germany        |

mIgG, mIgG, rabbit IgG, goat IgG, streptavidin\*

[1] Matzku S, Wenzel A, Liu S, and Zöller M (1989). Antigenic differences between metastatic and nonmetastatic BSp73 rat tumor variants characterized by monoclonal antibodies. *Cancer Res* **49**, 1294–1299.

[2] Chang YW, Chen SC, Cheng EC, Ko YP, Lin YC, Kao YR, Tsay YG, Yang PC, Wu CW, and Roffler SR (2005). CD13 (aminopeptidase N) can associate with tumor-associated antigen L6 and enhance the motility of human lung cancer cells. *Int J Cancer* **116**, 243–252.

EAACC, European Association of Animal Cell Cultures (Porton Down, United Kingdom).

\*Secondary antibodies and streptavidin were FITC, PE, biotin, or HRP labeled.

**Table W2.** List of Matrix Proteins.

| Matrix Protein | Supplier                              | Concentration  |
|----------------|---------------------------------------|----------------|
| Coll I         | Sigma, Munich, Germany                | 10 $\mu$ g/ml  |
| Coll II        | Sigma, Munich, Germany                | 10 $\mu$ g/ml  |
| Coll IV        | Sigma, Munich, Germany                | 10 $\mu$ g/ml  |
| FN             | Sigma, Munich, Germany                | 2 $\mu$ g/ml   |
| HA             | Sigma, Munich, Germany                | 100 $\mu$ g/ml |
| LN111          | Sigma, Munich, Germany                | 1 $\mu$ g/ml   |
| LN332          | 804G [1] supernatant*                 | 10 $\mu$ g/ml  |
| Vitronectin    | Sigma, Munich, Germany                | 1 $\mu$ g/ml   |
| Matrigel       | Becton Dickinson, Heidelberg, Germany | 1:1 dilution   |

[1] Homma Y, Ozono S, Numata I, Seidenfeld J, and Oyasu R (1985).  $\alpha$ -Difluoromethylornithine inhibits cell growth stimulated by a tumor-promoting rat urinary fraction. *Carcinogenesis* **6**, 159–161. \*804G cell culture supernatant was used as source of LN332. 804G cells were cultured (48 hours) in serum-free medium. Cleared supernatants (2  $\times$  10 minutes, 500g; 1  $\times$  20 minutes, 2000g; 1  $\times$  30 minutes, 10,000g; 90 minutes, 100,000g) were centrifuged for vesicle depletion and concentrated. These serum-free, vesicle-depleted supernatants, highly enriched for LN332, are for brevity referred to as LN332.

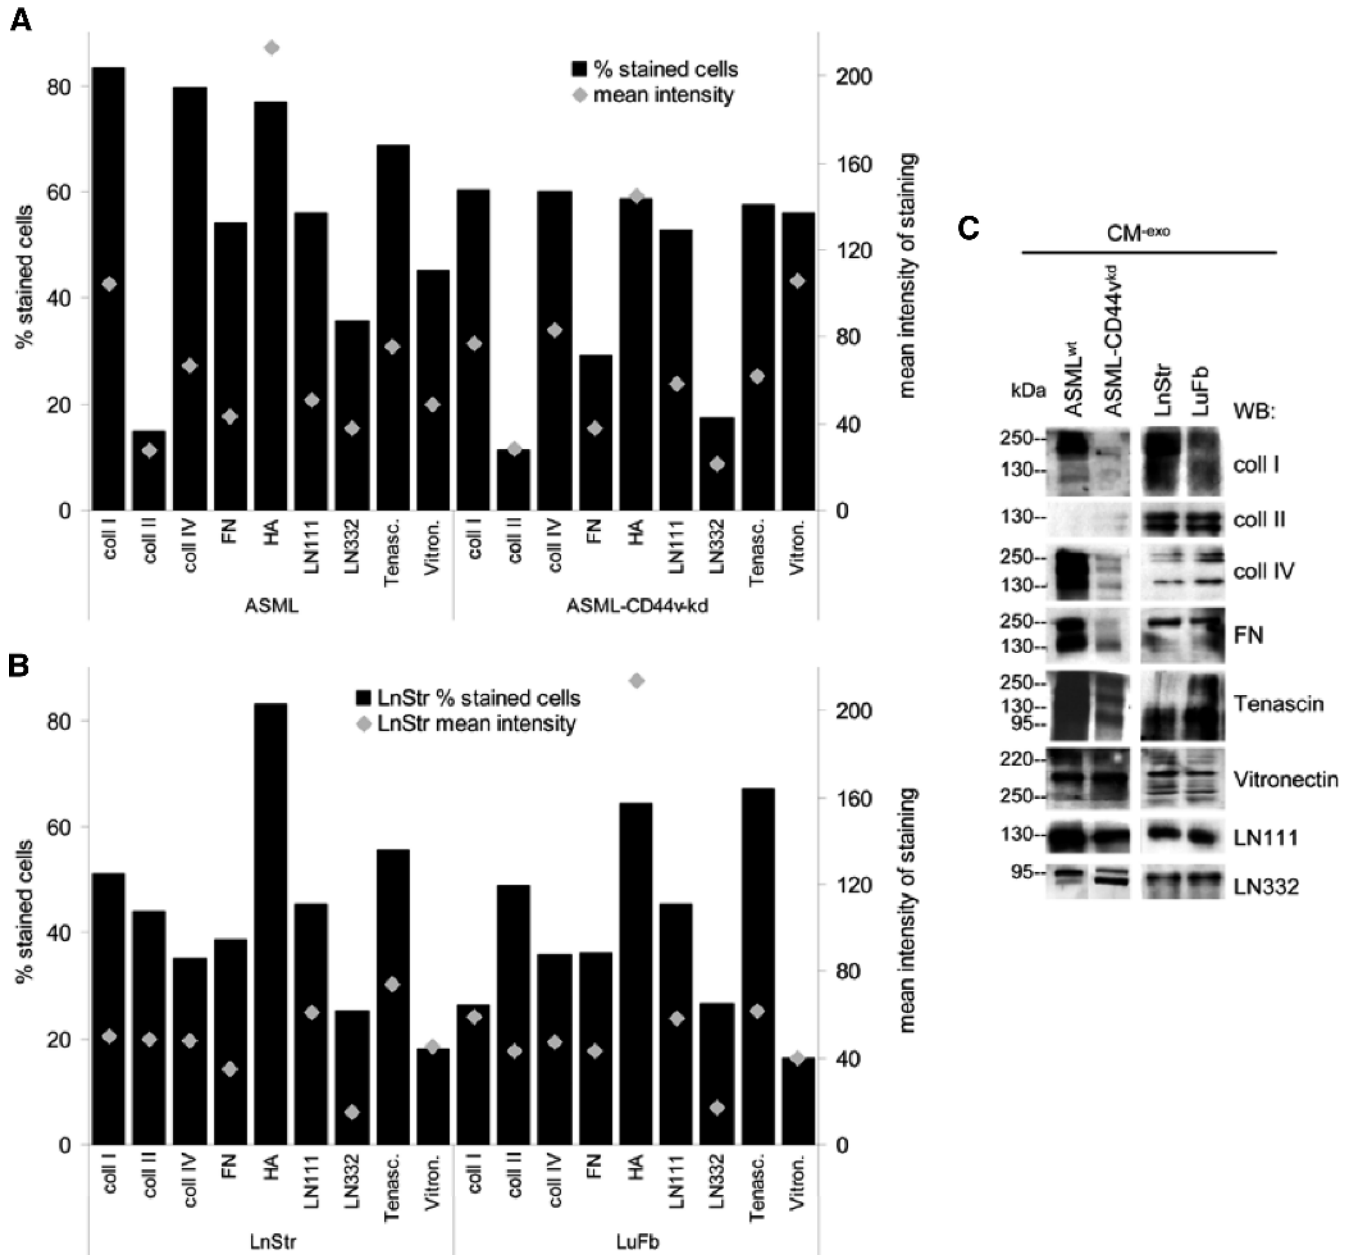

**Figure W1.** Recovery of matrix proteins in tumor and stroma cell CM. (A, B) ASML<sup>wt</sup>, ASML-CD44<sup>vkd</sup>, LnStr, and LuFb were stained with the indicated antibodies. The percent of stained cells and the intensity of staining were evaluated by flow cytometry. Mean values of triplicates are presented. (C) WB analysis of the indicated matrix proteins in CM<sup>-exo</sup> of ASML<sup>wt</sup>, ASML-CD44<sup>vkd</sup>, LnStr, and LuFb.

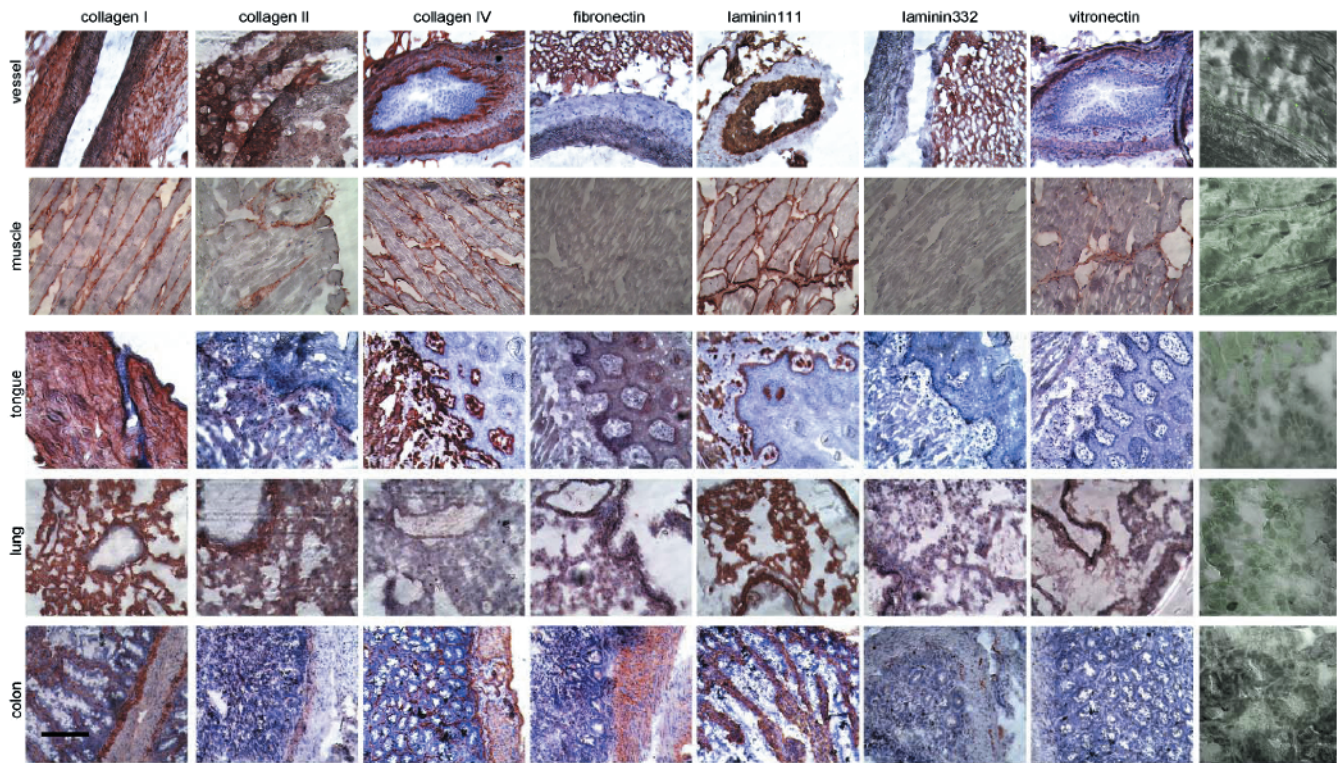

**Figure W2.** ECM proteins in different rat tissues: Rats received an i.v. injection of 200  $\mu\text{g}$  of dye-labeled ASML<sup>wt</sup> exosomes and were sacrificed after 48 hours (see Figure 1E). Sections of shock-frozen tissues were stained with the indicated antibodies and counterstained with H&E (scale bar, 100  $\mu\text{m}$ ). Recovery of dye-labeled exosomes is shown for comparison.

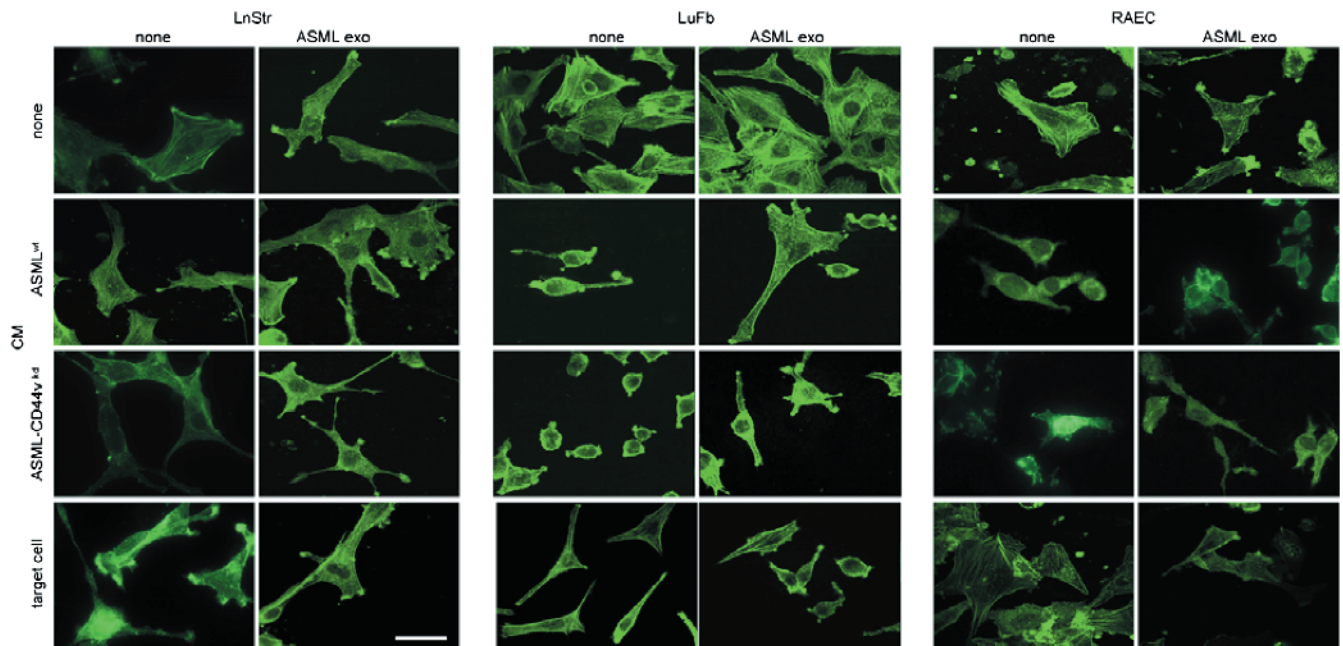

**Figure W3.** TEX-modulated CM and cell spreading: LnStr, LuFb, and RAEC were seeded on cover slides coated with BSA, ASML<sup>wt</sup>, ASML-CD44v<sup>kd</sup>, or target cell CM<sup>-exo</sup>. Where indicated, the CM<sup>-exo</sup> was pretreated with ASML<sup>wt</sup> exosomes. Four hours after seeding, cells were stained with phalloidin-FITC. Staining was evaluated by confocal microscopy (scale bar, 10  $\mu\text{m}$ ). Representative examples are shown. ASML<sup>wt</sup> and target cell CM promote cell spreading. ASML<sup>wt</sup> exosome-treated CM supports the formation of focal adhesion clusters.

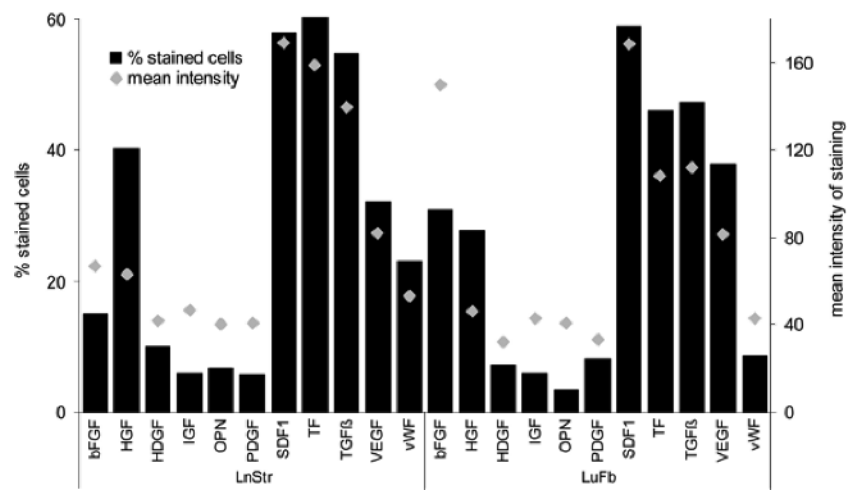

**Figure W4.** Cytokine and chemokine expression in stroma cells: Flow cytometry analysis of cytokine/chemokine expression in LnStr and LuFb cells. Mean values (three assays) of the percentage of stained cells and the mean intensity of staining are shown. LnStr and LuFb are rich in bFGF, HGF, SDF1, TF, and VEGF.
